# Supplementary material for: Combinatorial microRNA Loading into Extracellular Vesicles for Increased Anti-Inflammatory Efficacy
Source: Noncoding RNA. 2022 Oct 21;8(5):71. doi: 10.3390/ncrna8050071 (PMC9611452; doi:10.3390/ncrna8050071)
Supplement: Supplementary file 1 [file ncrna-08-00071-s001.zip › Spreadsheet S1.xlsx]

## Sheet: Sheet1
	Reference		Adiponectin		CCL6		CD160		Amphiregulin		Angiopoietin-1		CCL11		CCL12		Chemerin		Chitinase 3-like 1		Angiopoietin-2		Angiopoietin-like 3		CCL17		CCL19		Tissue Factor		C5a		BAFF		CD93		CCL20		CCL21		Complement Factor D		CRP		CCL2		CCL3		CCL22
	Duplicate 1	Duplicate 2	Duplicate 1	Duplicate 2	Duplicate 1	Duplicate 2	Duplicate 1	Duplicate 2	Duplicate 1	Duplicate 2	Duplicate 1	Duplicate 2	Duplicate 1	Duplicate 2	Duplicate 1	Duplicate 2	Duplicate 1	Duplicate 2	Duplicate 1	Duplicate 2	Duplicate 1	Duplicate 2	Duplicate 1	Duplicate 2	Duplicate 1	Duplicate 2	Duplicate 1	Duplicate 2	Duplicate 1	Duplicate 2	Duplicate 1	Duplicate 2	Duplicate 1	Duplicate 2	Duplicate 1	Duplicate 2	Duplicate 1	Duplicate 2	Duplicate 1	Duplicate 2	Duplicate 1	Duplicate 2	Duplicate 1	Duplicate 2	Duplicate 1	Duplicate 2	Duplicate 1	Duplicate 2	Duplicate 1
LPS only	0.968198	1.0318	1.14005	0.859951	1.02662	0.973384	1.02128	0.978723	1.00881	0.991189	1.00248	0.997519	1.0142	0.985801	1.00758	0.992418	1.01938	0.98062	1.01389	0.986111	0.989362	1.01064	0.986547	1.01345	1	1	0.989518	1.01048	0.995327	1.00467	1.01015	0.989848	1.00465	0.995349	1.01272	0.987277	0.995	1.005	1.00241	0.99759	0.997468	1.00253	0.996109	1.00389	0.993565	1.00644	0.99162	1.00838	0.996669
Neg Ctrl	0.897527	0.961131	1.31204	0.889435	1.12548	1.07985	1.02979	0.987234	1.0793	1.05286	1.09677	1.1067	1.04665	1.01826	1.07329	1.06487	1.00775	1.00388	1.06019	1.05556	1.17553	1.17553	1.09865	1.09417	0.907246	0.904348	1.07338	1.0608	1.1028	1.11215	1.12183	1.1066	0.944186	0.995349	1.08906	1.08397	1.1	1.115	1.06024	1.06506	1.1038	1.09367	0.996109	0.996109	1.24324	1.24839	1.1648	1.13687	0.826116
TRI	0.897527	0.897527	1.18919	1.03686	1.24335	1.12928	1.0766	0.995745	1.05286	1.00441	1.04715	1.03722	1.00609	0.989858	0.893008	0.847515	1.0155	1	1.02315	0.972222	1.1383	1.17553	1.13004	1.12556	0.8	0.8	1.1153	1.15304	1.1028	1.1028	1.11675	1.1066	0.981395	0.962791	1.07379	1.12468	1.145	1.095	1.06988	1.09398	1.1038	1.08861	0.988327	0.996109	1.04505	1.09395	1.01117	1.02235	0.542305
[truncated: 181 more columns]
