# Supplementary figures and images for: Combinatorial microRNA Loading into Extracellular Vesicles for Increased Anti-Inflammatory Efficacy
Source: MDPI journal article supplement (doi:10.3390/ncrna8050071), 2022-10-21

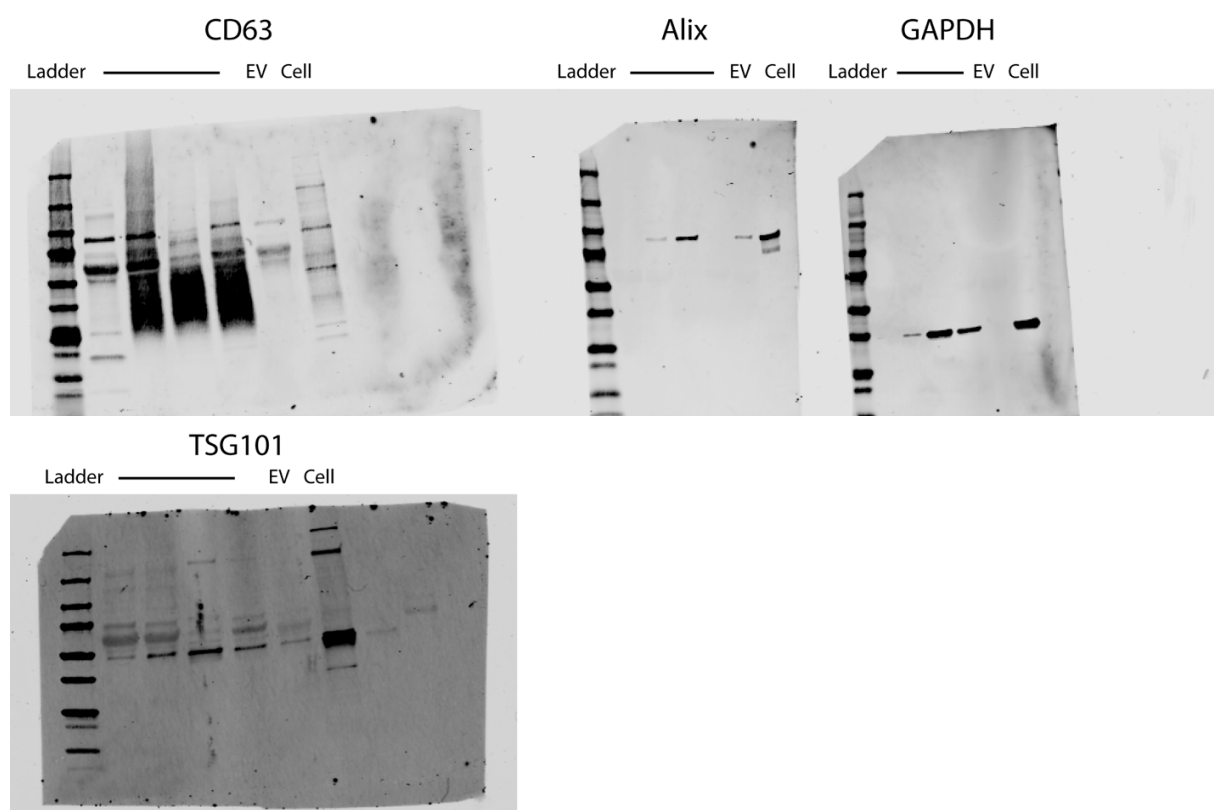

Figure S1: Full immunoblot images related to extracellular vesicle characterization.

Supplement: s1 [file s1]
